# Supplementary material for: Association of higher axillary pathologic complete response rate with breast pathologic complete response after neoadjuvant chemotherapy
Source: PubMed Central journal article supplement — Ann Transl Med. 2020 Aug;8(16):992. doi: 10.21037/atm-20-5172 (PMC7475504; doi:10.21037/atm-20-5172), 2020-08
Supplement: atm-08-16-992-dss.pdf [file atm-08-16-992-dss.pdf]

## Data Sharing Statement

|                     |                                                                                                                                                    |                                                                                                                                                              |
|---------------------|----------------------------------------------------------------------------------------------------------------------------------------------------|--------------------------------------------------------------------------------------------------------------------------------------------------------------|
| <b>Article Info</b> | <a href="http://dx.doi.org/10.21037/atm-20-5172">http://dx.doi.org/10.21037/atm-20-5172</a>                                                        |                                                                                                                                                              |
| <b>Item</b>         | <b>Question</b>                                                                                                                                    | <b>Authors' Response<br/>(place "-" if not applicable)</b>                                                                                                   |
| 1                   | Would you like to share data collected for your study to others?                                                                                   | No.                                                                                                                                                          |
| 2                   | If not, would you like to share the reason for your decision?<br>如果您不愿意共享数据，可以说说原因吗？                                                               | Because this study is based on CSCO BC database, and this database can only be applied for use in a small area, and it is not completely open to the public. |
| 3                   | What data in particular will be shared?                                                                                                            | -                                                                                                                                                            |
| 4                   | Any other documents will be share? Such as study protocol, statistical analysis plan, informed consent form, clinical study report, analytic code. | Statistical analysis plan was reported in the paper.                                                                                                         |
| 5                   | When will data availability begin?                                                                                                                 | -                                                                                                                                                            |
| 6                   | When will data availability end?                                                                                                                   | -                                                                                                                                                            |
| 7                   | To whom will you share the data?                                                                                                                   | -                                                                                                                                                            |
| 8                   | For what type of analysis or purpose?                                                                                                              | -                                                                                                                                                            |
| 9                   | How or where can the data/documents be obtained?                                                                                                   | -                                                                                                                                                            |
| 10                  | Any other restrictions?                                                                                                                            | -                                                                                                                                                            |
